# Supplementary material for: How to implement endurance exercise training in sickle cell disease
Source: PubMed Central journal article supplement — Haematologica. 2020 Aug 27;106(5):1476–9. doi: 10.3324/haematol.2020.267047 (PMC8094104; doi:10.3324/haematol.2020.267047), 2020-08-27
Supplement: 2020_267047-DisclosuresContributions.pdf [file 2020_267047-DisclosuresContributions.pdf]

Haematologica  
HAEMATOL/2020/267047  
Version 3

How to implement endurance exercise training in sickle cell disease

Laurent A. Messonnier, Manon Riccetti, Benjamin Chatel, Frédéric Galactéros, Barnabas Gellen, Thomas Rupp, Léonard Féasson, and Pablo Bartolucci

Disclosures: L.A.M. receives/ed gifts and consulting fees from Addmedica and bluebirdbio, respectively. P.B. receives/ed grants and/or consulting fees from Addmedica, bluebirdbio, Emmaus, Fondation Fabre, GBT, Hermanext, Novartis and Roche. All are outside the submitted work.

Contributions: Contribution: L.A.M., F.G., L.F. and P.B. designed and conducted this study. M.R. and B.C. analyzed data. M.R. created the figures. L.A.M. wrote the first draft of the article. All authors critically reviewed the draft and approved the final version for publication.
